# Supplementary material for: Genetic variation affects morphological retinal phenotypes extracted from UK Biobank optical coherence tomography images
Source: PubMed Central journal article supplement (PMC8143408; doi:10.1371/journal.pgen.1009497), 2021-05-12
Supplement: pgen.1009497.s005.pdf [file pgen.1009497.s005.pdf]

| SNP         | MTAG effect size | MTAG p-value | Raine RNFL effect size | Raine RNFL p-value | Raine GCIPL effect size | Raine GCIPL p-value |
|-------------|------------------|--------------|------------------------|--------------------|-------------------------|---------------------|
| rs1042602   | -0.36            | 3.96E-22     | -0.20                  | 0.11               | -                       | -                   |
| rs10762201  | 0.46             | 1.05E-26     | 0.42                   | 2.95E-03           | -                       | -                   |
| rs115520750 | 1.12             | 2.54E-10     | -0.66                  | 0.39               | -                       | -                   |
| rs117300236 | -0.25            | 5.57E-09     | -0.15                  | 0.28               | -                       | -                   |
| rs11762530  | 0.53             | 3.45E-28     | -                      | -                  | 0.78                    | 8.00E-04            |
| rs118031671 | 0.93             | 2.53E-09     | -0.26                  | 0.66               | -                       | -                   |
| rs1254276   | -0.28            | 7.52E-14     | -0.24                  | 0.05               | -                       | -                   |
| rs12574166  | 0.28             | 2.82E-08     | 0.35                   | 3.32E-02           | -                       | -                   |
| rs12719025  | 0.30             | 3.09E-10     | -                      | -                  | 0.57                    | 1.66E-02            |
| rs12998032  | 0.30             | 6.97E-10     | -                      | -                  | 0.50                    | 2.64E-02            |
| rs13010692  | 0.22             | 6.72E-09     | 0.09                   | 0.49               | -                       | -                   |
| rs13083522  | 0.31             | 4.51E-08     | -                      | -                  | -0.28                   | 0.32                |
| rs13215351  | -0.33            | 1.36E-09     | -                      | -                  | -0.27                   | 0.30                |
| rs143330165 | 1.04             | 1.97E-08     | -1.81                  | 0.21               | -                       | -                   |
| rs146652416 | 0.62             | 4.46E-08     | 0.37                   | 0.38               | -                       | -                   |
| rs1470108   | 0.24             | 7.09E-10     | 0.10                   | 0.43               | -                       | -                   |
| rs149831820 | -0.42            | 2.53E-08     | -0.37                  | 0.13               | -                       | -                   |
| rs17279437  | -0.77            | 7.81E-24     | -                      | -                  | -1.76                   | 1.53E-06            |
| rs17421627  | 0.97             | 8.09E-27     | -                      | -                  | 0.58                    | 0.20                |
| rs1800407   | -0.60            | 3.19E-12     | -0.28                  | 0.18               | -0.49                   | 0.23                |
| rs181211282 | 0.67             | 1.12E-08     | -0.19                  | 0.65               | -                       | -                   |
| rs1947075   | -0.21            | 2.60E-08     | 0.02                   | 0.86               | -                       | -                   |
| rs2004187   | 0.25             | 1.43E-11     | 0.20                   | 0.10               | 0.45                    | 0.06                |
| rs2008905   | -0.36            | 6.81E-14     | -                      | -                  | 0.03                    | 0.90                |
| rs2271758   | -0.22            | 1.34E-09     | -0.41                  | 9.13E-04           | -                       | -                   |
| rs2787394   | -0.28            | 8.64E-09     | -                      | -                  | -0.69                   | 3.71E-03            |
| rs35337422  | 0.37             | 3.50E-08     | -                      | -                  | 0.12                    | 0.71                |
| rs4871827   | -0.29            | 7.41E-09     | -                      | -                  | -0.34                   | 0.16                |
| rs5442      | -0.69            | 2.36E-13     | -                      | -                  | -1.04                   | 2.18E-02            |
| rs62252355  | -0.37            | 2.17E-16     | -0.05                  | 0.72               | -                       | -                   |
| rs66511946  | -0.36            | 2.15E-13     | -                      | -                  | -0.70                   | 1.07E-02            |
| rs6989495   | 0.23             | 1.27E-09     | -0.01                  | 0.96               | -                       | -                   |
| rs72739513  | 0.72             | 8.88E-09     | -                      | -                  | 0.26                    | 0.71                |
| rs7277632   | 0.34             | 1.20E-10     | -                      | -                  | 0.69                    | 6.14E-03            |
| rs73348111  | 1.12             | 7.15E-10     | 0.88                   | 0.21               | -                       | -                   |
| rs7503894   | 0.56             | 2.49E-29     | -                      | -                  | 0.38                    | 0.14                |
| rs79833181  | 0.86             | 1.55E-09     | -0.06                  | 0.92               | -                       | -                   |
| rs9398171   | 0.50             | 7.51E-22     | -                      | -                  | 0.37                    | 0.14                |
| rs980772    | -0.21            | 4.62E-08     | -0.35                  | 5.36E-03           | -                       | -                   |
