# Supplementary material for: Genetic variation affects morphological retinal phenotypes extracted from UK Biobank optical coherence tomography images
Source: PubMed Central journal article supplement (PMC8143408; doi:10.1371/journal.pgen.1009497), 2021-05-12

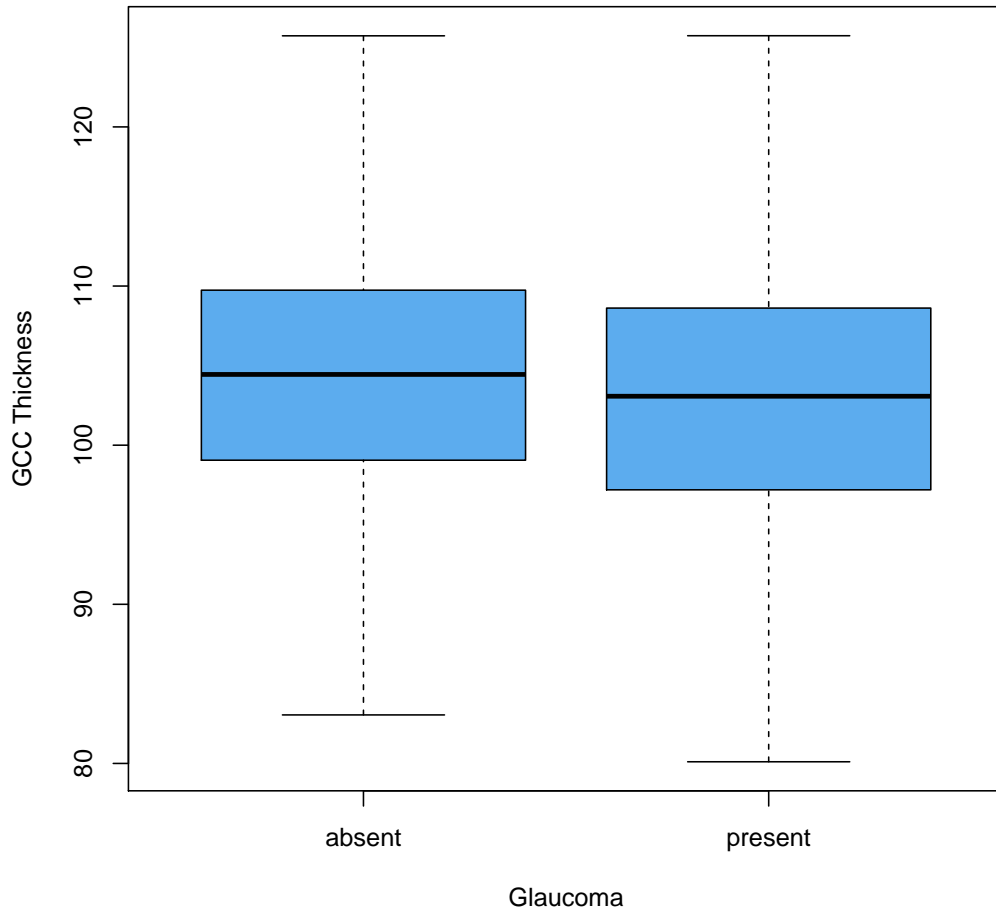

Supplement: pgen.1009497.s018.pdf [file pgen.1009497.s018.pdf]
